# Supplementary material for: Micro-fibrillated cellulose reinforced eco-friendly polymeric resin from non-edible ‘Jatropha curcas’ seed waste after biodiesel production
Source: Royal Society of Chemistry journal article supplement (doi:10.1039/c6ra07749h), 2016-01-01
Supplement: c6ra07749h1.pdf [file c6ra07749h1.pdf]

## Electronic Supplementary Information

for

### Micro-fibrillated Cellulose Reinforced Eco-friendly Polymeric Resin from Non-edible '*Jatropha curcus*' Seed Waste after Biodiesel production

Muhammad M. Rahman and Anil N. Netravali\*

Department of Fiber Science & Apparel Design, Cornell University, 37 Forest Home Drive, Ithaca, New York 14853, USA

*Page S2. Figure S1.* Isothermal TGA of MFC-reinforced JP resin for 30 h at 60 °C

*Page S2. Figure S2.* Typical tensile stress-strain responses of MFC-reinforced SPI resin in dry and conditioned states.

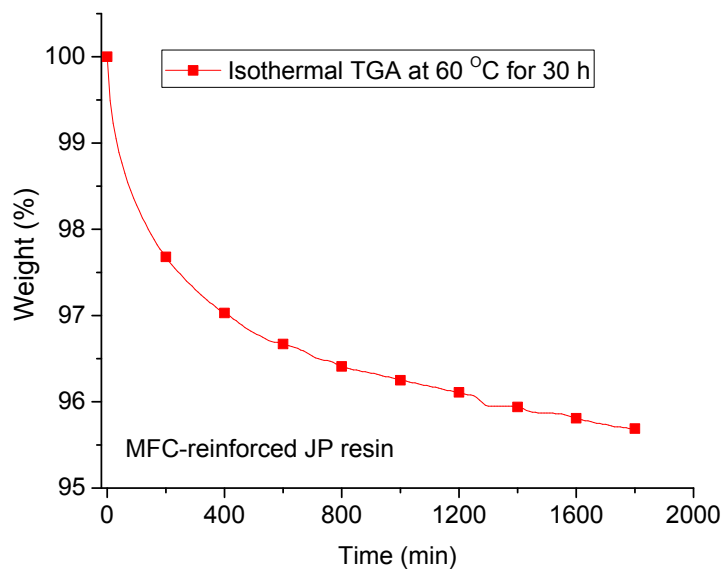

**Figure S1.** Isothermal TGA of MFC-reinforced JP resin for 30 h at 60 °C

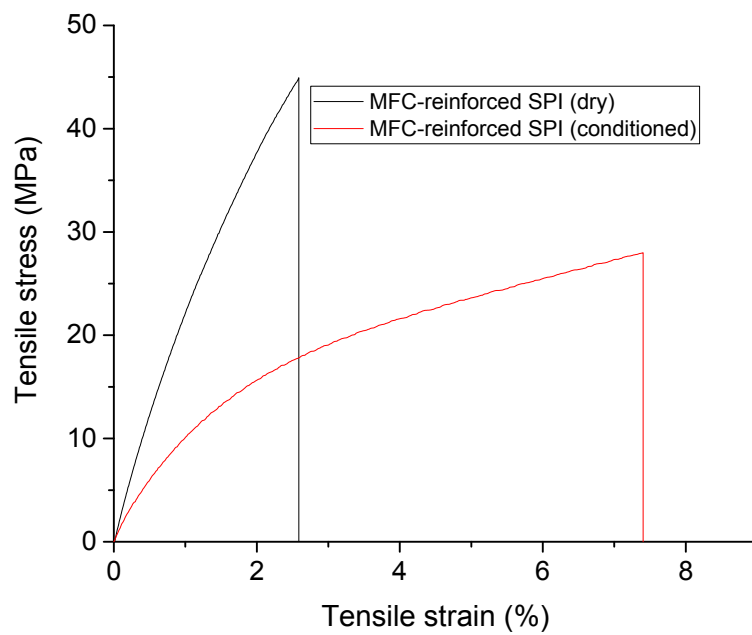

**Figure S2.** Typical tensile stress-strain responses of MFC-reinforced SPI resin in dry and conditioned states.
